# Supplementary material for: Fluorofenidone alleviates liver fibrosis by inhibiting hepatic stellate cell autophagy via the TGF-β1/Smad pathway: implications for liver cancer
Source: PeerJ journal article supplement (doi:10.7717/peerj.16060), 2023-09-28
Supplement: Fig4.zip [file Fig4.zip]

## Sheet: Beclin-1
1		Beclin-1	GAPDH	Relative band density（Beclin-1/GAPDH）
	control	6073.28	19437.7	0.312449
	TGF-β1	19074.7	20173.4	0.945539
	TGF-β1+AKF-PD	13573.1	26440.5	0.513346
	oe Smad2	12614.3	16784.5	0.751546
	oe Smad2+AKF-PD	10402.8	20221.8	0.514436
	oe Smad3	15662.5	20690	0.757008
	oe Smad3+AKF-PD	12488	20036.7	0.623256
2		Beclin-1	GAPDH	Relative band density（Beclin-1/GAPDH）
	control	8454.33	25295.7	0.334219
	TGF-β1	26271	25536.5	1.02876
	TGF-β1+AKF-PD	13470.9	24608.2	0.547413
	oe Smad2	17271.7	20943.8	0.824668
	oe Smad2+AKF-PD	11553.2	25888.7	0.446263
	oe Smad3	16397.7	18890.4	0.86804
	oe Smad3+AKF-PD	11601	20283.7	0.571935
3		Beclin-1	GAPDH	Relative band density（Beclin-1/GAPDH）
	control	6375.79	25962.5	0.245577
	TGF-β1	23293.3	24682.3	0.943727
	TGF-β1+AKF-PD	8116.76	26194.4	0.309866
	oe Smad2	21287.2	21179.9	1.00507
	oe Smad2+AKF-PD	6002.35	20463.5	0.29332
	oe Smad3	22142.1	21425.8	1.03343
	oe Smad3+AKF-PD	7461.84	12817.7	0.582152
	control	TGF-β1	TGF-β1+AKF-PD	oe Smad2	oe Smad2+AKF-PD	oe Smad3	oe Smad3+AKF-PD
	0.312449	0.945539	0.513346	0.751546	0.514436	0.757008	0.623256
	0.334219	1.02876	0.547413	0.824668	0.446263	0.86804	0.571935
	0.245577	0.943727	0.309866	1.00507	0.29332	1.03343	0.582152
	0.297415
	date:mean control
	control	TGF-β1	TGF-β1+AKF-PD	oe Smad2	oe Smad2+AKF-PD	oe Smad3	oe Smad3+AKF-PD
	1.05055	3.17919	1.72603	2.52693	1.72969	2.54529	2.09558
	1.12375	3.45901	1.84057	2.77278	1.50047	2.91861	1.92302
	0.825704	3.1731	1.04186	3.37934	0.986231	3.47471	1.95737
	Tukey's multiple comparisons test	Mean Diff.	95.00% CI of diff.	Below threshold?	Summary	Adjusted P Value
	control vs. TGF-β1	-2.27	-3.214 to -1.327	Yes	****	<0.0001	A-B
	control vs. TGF-β1+AKF-PD	-0.5362	-1.480 to 0.4075	No	ns	0.4882	A-C
	control vs. oe Smad2	-1.893	-2.837 to -0.9494	Yes	***	0.0001	A-D
	control vs. oe Smad2+AKF-PD	-0.4055	-1.349 to 0.5381	No	ns	0.7585	A-E
	control vs. oe Smad3	-1.98	-2.923 to -1.036	Yes	****	<0.0001	A-F
	control vs. oe Smad3+AKF-PD	-0.992	-1.936 to -0.04838	Yes	*	0.0365	A-G
	TGF-β1 vs. TGF-β1+AKF-PD	1.734	0.7907 to 2.678	Yes	***	0.0003	B-C
	TGF-β1 vs. oe Smad2	0.3774	-0.5662 to 1.321	No	ns	0.8104	B-D
	TGF-β1 vs. oe Smad2+AKF-PD	1.865	0.9214 to 2.809	Yes	***	0.0001	B-E
	TGF-β1 vs. oe Smad3	0.2909	-0.6527 to 1.234	No	ns	0.932	B-F
	TGF-β1 vs. oe Smad3+AKF-PD	1.278	0.3348 to 2.222	Yes	**	0.0056	B-G
	TGF-β1+AKF-PD vs. oe Smad2	-1.357	-2.300 to -0.4133	Yes	**	0.0033	C-D
	TGF-β1+AKF-PD vs. oe Smad2+AKF-PD	0.1307	-0.8129 to 1.074	No	ns	0.9989	C-E
	TGF-β1+AKF-PD vs. oe Smad3	-1.443	-2.387 to -0.4998	Yes	**	0.0019	C-F
	TGF-β1+AKF-PD vs. oe Smad3+AKF-PD	-0.4558	-1.399 to 0.4878	No	ns	0.6562	C-G
	oe Smad2 vs. oe Smad2+AKF-PD	1.488	0.5439 to 2.431	Yes	**	0.0014	D-E
	oe Smad2 vs. oe Smad3	-0.08652	-1.030 to 0.8571	No	ns	0.9999	D-F
	oe Smad2 vs. oe Smad3+AKF-PD	0.901	-0.04258 to 1.845	No	ns	0.0657	D-G
	oe Smad2+AKF-PD vs. oe Smad3	-1.574	-2.518 to -0.6305	Yes	***	0.0008	E-F
	oe Smad2+AKF-PD vs. oe Smad3+AKF-PD	-0.5865	-1.530 to 0.3571	No	ns	0.3913	E-G
	oe Smad3 vs. oe Smad3+AKF-PD	0.9876	0.04394 to 1.931	Yes	*	0.0376	F-G

## Sheet: LC3
1		LC3-Ⅰ	LC3-Ⅱ	Relative band density（LC3-Ⅱ/LC3-Ⅰ）
	control	32705.6	18501.3	0.565694
	TGF-β1	8812.57	27247.2	3.09186
	TGF-β1+AKF-PD	13026	14505.3	1.11357
	oe Smad2	3372.62	10430.3	3.09265
	oe Smad2+AKF-PD	5315.93	5300.33	0.997064
	oe Smad3	5772.89	14496.6	2.51115
	oe Smad3+AKF-PD	21753.8	15096.9	0.693989
2		LC3-Ⅰ	LC3-Ⅱ	Relative band density（LC3-Ⅱ/LC3-Ⅰ）
	control	8623.45	4187.43	0.485586
	TGF-β1	8234.12	24015.7	2.9166
	TGF-β1+AKF-PD	24724.9	24050.6	0.97273
	oe Smad2	9979.35	28087.2	2.81454
	oe Smad2+AKF-PD	11289.2	8303.98	0.735567
	oe Smad3	4990.76	16023.8	3.2107
	oe Smad3+AKF-PD	9125.03	6838.38	0.749408
3		LC3-Ⅰ	LC3-Ⅱ	Relative band density（LC3-Ⅱ/LC3-Ⅰ）
	control	5491.15	2726.62	0.496548
	TGF-β1	8546.2	25079.4	2.93457
	TGF-β1+AKF-PD	19827.3	18356.9	0.925838
	oe Smad2	10079.5	24839.3	2.46434
	oe Smad2+AKF-PD	14503.9	13507.2	0.931285
	oe Smad3	4275.2	13898.8	3.25104
	oe Smad3+AKF-PD	5328.55	4180.62	0.78457
	control	TGF-β1	TGF-β1+AKF-PD	oe Smad2	oe Smad2+AKF-PD	oe Smad3	oe Smad3+AKF-PD
	0.565694	3.09186	1.11357	3.09265	0.997064	2.51115	0.693989
	0.485586	2.9166	0.97273	2.81454	0.735567	3.2107	0.749408
	0.496548	2.93457	0.925838	2.46434	0.931285	3.25104	0.78457
	0.515943
	date:mean control
	control	TGF-β1	TGF-β1+AKF-PD	oe Smad2	oe Smad2+AKF-PD	oe Smad3	oe Smad3+AKF-PD
	1.09643	5.99264	2.15832	5.99418	1.93251	4.86712	1.34509
	0.941163	5.65296	1.88535	5.45514	1.42568	6.22298	1.4525
	0.962408	5.68778	1.79446	4.77639	1.80502	6.30117	1.52065
	Tukey's multiple comparisons test	Mean Diff.	95.00% CI of diff.	Below threshold?	Summary	Adjusted P Value
	control vs. TGF-β1	-4.778	-5.921 to -3.634	Yes	****	<0.0001	A-B
	control vs. TGF-β1+AKF-PD	-0.946	-2.090 to 0.1975	No	ns	0.138	A-C
	control vs. oe Smad2	-4.409	-5.552 to -3.265	Yes	****	<0.0001	A-D
	control vs. oe Smad2+AKF-PD	-0.7211	-1.865 to 0.4225	No	ns	0.3761	A-E
	control vs. oe Smad3	-4.797	-5.941 to -3.653	Yes	****	<0.0001	A-F
	control vs. oe Smad3+AKF-PD	-0.4394	-1.583 to 0.7042	No	ns	0.8357	A-G
	TGF-β1 vs. TGF-β1+AKF-PD	3.832	2.688 to 4.975	Yes	****	<0.0001	B-C
	TGF-β1 vs. oe Smad2	0.3692	-0.7744 to 1.513	No	ns	0.9172	B-D
	TGF-β1 vs. oe Smad2+AKF-PD	4.057	2.913 to 5.200	Yes	****	<0.0001	B-E
	TGF-β1 vs. oe Smad3	-0.01929	-1.163 to 1.124	No	ns	>0.9999	B-F
	TGF-β1 vs. oe Smad3+AKF-PD	4.338	3.195 to 5.482	Yes	****	<0.0001	B-G
	TGF-β1+AKF-PD vs. oe Smad2	-3.463	-4.606 to -2.319	Yes	****	<0.0001	C-D
	TGF-β1+AKF-PD vs. oe Smad2+AKF-PD	0.225	-0.9186 to 1.369	No	ns	0.9923	C-E
	TGF-β1+AKF-PD vs. oe Smad3	-3.851	-4.995 to -2.707	Yes	****	<0.0001	C-F
	TGF-β1+AKF-PD vs. oe Smad3+AKF-PD	0.5066	-0.6370 to 1.650	No	ns	0.7338	C-G
	oe Smad2 vs. oe Smad2+AKF-PD	3.688	2.544 to 4.831	Yes	****	<0.0001	D-E
	oe Smad2 vs. oe Smad3	-0.3885	-1.532 to 0.7551	No	ns	0.8978	D-F
	oe Smad2 vs. oe Smad3+AKF-PD	3.969	2.826 to 5.113	Yes	****	<0.0001	D-G
	oe Smad2+AKF-PD vs. oe Smad3	-4.076	-5.220 to -2.932	Yes	****	<0.0001	E-F
	oe Smad2+AKF-PD vs. oe Smad3+AKF-PD	0.2817	-0.8619 to 1.425	No	ns	0.9759	E-G
	oe Smad3 vs. oe Smad3+AKF-PD	4.358	3.214 to 5.501	Yes	****	<0.0001	F-G

## Sheet: P62
1		P62	GAPDH	Relative band density（P62/GAPDH）
	control	21360.8	16397.4	1.3027
	TGF-β1	8777.1	28302.3	0.310119
	TGF-β1+AKF-PD	15598.1	18929.5	0.824009
	oe Smad2	9632.59	28488.8	0.338119
	oe Smad2+AKF-PD	15548.7	22930.6	0.678078
	oe Smad3	9754.54	24792.1	0.393454
	oe Smad3+AKF-PD	14760.2	18837.7	0.783546
2
	control	23923.4	20421.2	1.17149
	TGF-β1	7428.47	22145.3	0.335443
	TGF-β1+AKF-PD	18875	20014.6	0.94306
	oe Smad2	11118.1	22465.6	0.494893
	oe Smad2+AKF-PD	19551	22365.4	0.874159
	oe Smad3	13502.1	23021.5	0.586499
	oe Smad3+AKF-PD	21781.8	21645.8	1.00628
3
	control	23728.6	18325.7	1.29482
	TGF-β1	11964.1	28806.8	0.415322
	TGF-β1+AKF-PD	18426.9	22153.1	0.831799
	oe Smad2	11966.4	24125.7	0.496004
	oe Smad2+AKF-PD	14126.5	14339.4	0.985151
	oe Smad3	9560.81	19717.1	0.4849
	oe Smad3+AKF-PD	12534.5	13268	0.944714
	control	TGF-β1	TGF-β1+AKF-PD	oe Smad2	oe Smad2+AKF-PD	oe Smad3	oe Smad3+AKF-PD
	1.3027	0.310119	0.824009	0.338119	0.678078	0.393454	0.783546
	1.17149	0.335443	0.94306	0.494893	0.874159	0.586499	1.00628
	1.29482	0.415322	0.831799	0.496004	0.985151	0.4849	0.944714
	1.25634
	date:mean control
	control	TGF-β1	TGF-β1+AKF-PD	oe Smad2	oe Smad2+AKF-PD	oe Smad3	oe Smad3+AKF-PD
	1.0369	0.246844	0.655882	0.26913	0.539726	0.313175	0.623675
	0.932468	0.267	0.750642	0.393917	0.695799	0.466832	0.800962
	1.03063	0.330581	0.662082	0.394801	0.784145	0.385963	0.751958
	Tukey's multiple comparisons test	Mean Diff.	95.00% CI of diff.	Below threshold?	Summary	Adjusted P Value
	control vs. TGF-β1	0.7185	0.5000 to 0.9370	Yes	****	<0.0001	A-B
	control vs. TGF-β1+AKF-PD	0.3105	0.09199 to 0.5289	Yes	**	0.0037	A-C
	control vs. oe Smad2	0.6474	0.4289 to 0.8659	Yes	****	<0.0001	A-D
	control vs. oe Smad2+AKF-PD	0.3268	0.1083 to 0.5453	Yes	**	0.0023	A-E
	control vs. oe Smad3	0.6113	0.3929 to 0.8298	Yes	****	<0.0001	A-F
	control vs. oe Smad3+AKF-PD	0.2745	0.05599 to 0.4929	Yes	*	0.0102	A-G
	TGF-β1 vs. TGF-β1+AKF-PD	-0.4081	-0.6265 to -0.1896	Yes	***	0.0003	B-C
	TGF-β1 vs. oe Smad2	-0.07114	-0.2896 to 0.1473	No	ns	0.9142	B-D
	TGF-β1 vs. oe Smad2+AKF-PD	-0.3917	-0.6102 to -0.1733	Yes	***	0.0004	B-E
	TGF-β1 vs. oe Smad3	-0.1072	-0.3257 to 0.1113	No	ns	0.6412	B-F
	TGF-β1 vs. oe Smad3+AKF-PD	-0.4441	-0.6625 to -0.2256	Yes	***	0.0001	B-G
	TGF-β1+AKF-PD vs. oe Smad2	0.3369	0.1184 to 0.5554	Yes	**	0.0018	C-D
	TGF-β1+AKF-PD vs. oe Smad2+AKF-PD	0.01631	-0.2022 to 0.2348	No	ns	>0.9999	C-E
	TGF-β1+AKF-PD vs. oe Smad3	0.3009	0.08240 to 0.5194	Yes	**	0.0048	C-F
	TGF-β1+AKF-PD vs. oe Smad3+AKF-PD	-0.036	-0.2545 to 0.1825	No	ns	0.997	C-G
	oe Smad2 vs. oe Smad2+AKF-PD	-0.3206	-0.5391 to -0.1021	Yes	**	0.0028	D-E
	oe Smad2 vs. oe Smad3	-0.03604	-0.2545 to 0.1824	No	ns	0.997	D-F
	oe Smad2 vs. oe Smad3+AKF-PD	-0.3729	-0.5914 to -0.1544	Yes	***	0.0007	D-G
	oe Smad2+AKF-PD vs. oe Smad3	0.2846	0.06609 to 0.5030	Yes	**	0.0077	E-F
	oe Smad2+AKF-PD vs. oe Smad3+AKF-PD	-0.05231	-0.2708 to 0.1662	No	ns	0.979	E-G
	oe Smad3 vs. oe Smad3+AKF-PD	-0.3369	-0.5554 to -0.1184	Yes	**	0.0018	F-G
